# Supplementary material
Source: HighWire-hosted journal article supplement (https://diabetes.diabetesjournals.org/content/suppl/2004/03/09/53.4.1134)
Supplement: 0995_AppendixTable1.pdf [file 0995_AppendixTable1.pdf]

APPENDIX TABLE 1

Summary of HNF4 $\alpha$  dHPLC & Sequence Analysis in 96 Ashkenazi Jewish T2DM probands

| Promoter/<br>Exon | GenBank<br>Accession | 5' intronic<br>boundary | Exon | 3' intronic<br>boundary | Total<br>size (bp) | No.<br>WAVE<br>patterns | actual No.<br>of variants | dbSNPs<br>identified | NT_011362 Contig<br>position (lg= novel<br>SNPs) |
|-------------------|----------------------|-------------------------|------|-------------------------|--------------------|-------------------------|---------------------------|----------------------|--------------------------------------------------|
| P2                | AF509467             | ---                     | ---  | ---                     | 415                | 4                       | 0                         |                      |                                                  |
| Pr.3.4            | NT_011362            | ---                     | ---  | ---                     | 500                | 1                       | 0                         |                      |                                                  |
| Pr. 4.2           | NT_011362            | ---                     | ---  | ---                     | 500                | 6                       | 1                         | rs1800963*#          | 8082200                                          |
| Exon 1a           | U72959               | -75                     | 218  | 34                      | 327                | 4                       | 1                         |                      | lg8082797†                                       |
| Exn 1c            | U72960               | -46                     | 62   | 77                      | 185                | 2                       | 1                         |                      | lg8082890†                                       |
| Exon 1b           | U72959               | -99                     | 91   | 166                     | 356                | 4                       | 2                         | rs2071197‡#          | 8083399                                          |
|                   |                      |                         |      |                         |                    |                         |                           |                      | lg8084031‡                                       |
| Exon 2            | U72961.1             | -130                    | 174  | 96                      | 400                | 4                       | 3                         | rs736824‡            | 8087575                                          |
|                   |                      |                         |      |                         |                    |                         |                           | rs745975‡            | 8087608                                          |
|                   |                      |                         |      |                         |                    |                         |                           | rs736823§#           | 8087698                                          |
| Exon 3            | U72962.1             | -120                    | 64   | 189                     | 403                | 2                       | 0                         |                      |                                                  |
| Exon 4            | U72963.1             | -157                    | 106  | 385                     | 648                | 3                       | 2                         |                      | lg8095181§                                       |
|                   |                      |                         |      |                         |                    |                         |                           | rs1800961§           | 8095279                                          |
| Exon 5            | U72964.1             | -166                    | 155  | 264                     | 585                | 5                       | 2                         |                      | lg8095966‡                                       |
|                   |                      |                         |      |                         |                    |                         |                           | rs3212195#           | 8096010‡                                         |
| Exon 6            | U72965.1             | -212                    | 87   | 179                     | 478                | 4                       | 1                         |                      | lg8100208‡#                                      |
| Exon 7            | U72966               | -211                    | 155  | 137                     | 503                | 5                       | 1                         |                      | lg8101167‡                                       |
| Exon 8            | U72967               | -85                     | 236  | 175                     | 496                | 1                       | 0                         |                      |                                                  |
| Exon 9            | U72968               | -106                    | 152  | 120                     | 378                | 1                       | 0                         |                      |                                                  |
| Exon 10           | U72969               | -70                     | 89   | 65                      | 221                | 1                       | 0                         |                      |                                                  |
| <i>total</i>      |                      |                         |      |                         | 6395               | 47                      | 14                        |                      |                                                  |

Location of SNPs indicated as follows: \* Genomic region of HNF4 $\alpha$ ; † 5'UTR; ‡ Intronic; § coding: synonymous; # Characterized further in sample 3.
