# Supplementary material
Source: HighWire-hosted journal article supplement (https://diabetes.diabetesjournals.org/content/suppl/2004/03/09/53.4.1134)
Supplement: 0995_appendixtable2.pdf [file 0995_appendixtable2.pdf]

Appendix Table 2

Characterization of 19 SNPs across 78kb HNF4 $\alpha$  region  
in 68 unrelated Ashkenazi Jewish individuals

| *kb<br>position | SNP        | Major/Minor<br>Allele | Minor<br>allele<br>Frequency | (N)  |
|-----------------|------------|-----------------------|------------------------------|------|
| -3.926          | rs1884614  | G/A                   | 0.22                         | (30) |
| -0.858          | Y3         | G/A                   | 0.16                         | (22) |
| 4.396           | R1         | T/C                   | 0.24                         | (32) |
| 10.685          | R2         | T/C                   | 0.49                         | (66) |
| 23.300          | W1†        | A/T                   | 0.09                         | (13) |
| 27.574          | Y2         | T/C                   | 0.17                         | (23) |
| 35.658          | rs3761186† | C/T                   | 0.39                         | (53) |
| 43.065          | rs2425639  | A/G                   | 0.46                         | (63) |
| 44.840          | rs1800963  | C/A                   | 0.48                         | (65) |
| 45.990          | rs2071197† | G/A                   | 0.09                         | (13) |
| 49.634          | rs736821   | C/T                   | 0.17                         | (23) |
| 50.338          | rs736823†  | G/A                   | 0.06                         | (8)  |
| 54.595          | rs1885088  | C/T                   | 0.19                         | (26) |
| 56.895          | rs1535337  | G/A                   | 0.19                         | (25) |
| 58.690          | rs3212195  | G/A                   | 0.19                         | (26) |
| 62.848          | lg8100208  | G/A                   | 0.27                         | (36) |
| 66.316          | rs1028583  | G/T                   | 0.25                         | (33) |
| 73.035          | rs3818247  | G/T                   | 0.21                         | (28) |
| 74.766          | rs3212210  | G/T                   | 0.15                         | (20) |

\*kb position relative to the HNF4 $\alpha$  P2 promoter  
translation initiation site at chromosomal 20q position  
43622874

(N) number of successfully genotyped chromosomes  
with the minor allele

†SNPs eliminated based on minor allele frequency  
<0.09 and/or did not satisfy HWE
